# Supplementary material for: Prognostic Factors for Functional Recovery after Lingual Nerve Reconstruction Using an Artificial Nerve Conduit
Source: Research Square preprint supplement (doi:10.21203/rs.3.rs-7726878/v1), 2025-10-23
Supplement: Supplementary file 1 [file 8c965c3d281e56710804b31a.pdf]

Table 4. The length of the damaged lingual nerve

| Max | Min | Mean | Median | SD   |
|-----|-----|------|--------|------|
| 25  | 10  | 14.7 | 15     | 2.93 |

SD : standard deviation

The length of the damaged lingual nerve is indicated l

3y mm
