# Supplementary material for: Prognostic Factors for Functional Recovery after Lingual Nerve Reconstruction Using an Artificial Nerve Conduit
Source: Research Square preprint supplement (doi:10.21203/rs.3.rs-7726878/v1), 2025-10-23
Supplement: Supplementary file 2 [file cd04ffff8a560e13ac66ac29.pdf]

Table 3. The time from lingual nerve injury to nerve repair

| Max | Min | Mean | Median | SD   |
|-----|-----|------|--------|------|
| 204 | 2   | 17.3 | 6      | 28.5 |

SD : standard deviation

The time from lingual nerve injury to nerve repair surgery

ery is indicated by month
