# Supplementary material for: Prognostic Factors for Functional Recovery after Lingual Nerve Reconstruction Using an Artificial Nerve Conduit
Source: Research Square preprint supplement (doi:10.21203/rs.3.rs-7726878/v1), 2025-10-23
Supplement: Supplementary file 3 [file f6a191f18e849e09ee0a9cef.pdf]

Table 2. Back ground of patients (Age)

| Number | Max | Min | Mean | Median | SD   |
|--------|-----|-----|------|--------|------|
| Gender |     |     |      |        |      |
| Male   | 48  | 20  | 31.2 | 29     | 8    |
| Female | 63  | 18  | 34.7 | 32     | 11.3 |

SD : standard deviation

A Mann-Whitney U test (non-parametric test) revealed no significant difference

cant difference in the distribution between males and females, with a U value of 71.5 ar

nd a P value of 0.111
